# Supplementary material for: The Role and Regulation of Autophagy and the Proteasome During Aging and Senescence in Plants
Source: PubMed Central journal article supplement (PMC6523301; doi:10.3390/genes10040267), 2019-04-02
Supplement: genes-10-00267-s001.pdf [file genes-10-00267-s001.pdf]

**Table S1.** Detected post-translational modifications (PTMs) on proteasome subunits of *Arabidopsis*.

| Subunits | Gene-ID   | Quantity | Types, Locations of PTMs                                                                                                                                                                                       |
|----------|-----------|----------|----------------------------------------------------------------------------------------------------------------------------------------------------------------------------------------------------------------|
| Rpt1a    | AT1G53750 | 6        | V <sup>2</sup> nt, K <sup>13</sup> ub, S <sup>96</sup> ph, T <sup>125</sup> ph, C <sup>370</sup> ro, K <sup>400</sup> ub                                                                                       |
| Rpt1b    | AT1G53780 | 2        | S <sup>289</sup> ph, C <sup>563</sup> ro                                                                                                                                                                       |
| Rpt2a    | AT4G29040 | 3        | G <sup>2</sup> my, H <sup>123</sup> nt, K <sup>353</sup> nt                                                                                                                                                    |
| Rpt2b    | AT2G20140 | 3        | G <sup>2</sup> my, H <sup>123</sup> nt, K <sup>353</sup> nt                                                                                                                                                    |
| Rpt3     | AT5G58290 | 7        | A <sup>2</sup> na/nt, S <sup>16</sup> ph, A <sup>18</sup> nt, K <sup>70</sup> ac, C <sup>369</sup> no, K <sup>387</sup> ac                                                                                     |
| Rpt4a    | AT5G43010 | 6        | T <sup>2</sup> nt/na, K <sup>48</sup> ac, S <sup>80</sup> ph, K <sup>203</sup> ub, K <sup>304</sup> nt                                                                                                         |
| Rpt4b    | AT1G45000 | 4        | K <sup>48</sup> ac, S <sup>80</sup> ph, K <sup>203</sup> ub, K <sup>304</sup> nt                                                                                                                               |
| Rpt5a    | AT3G05530 | 7        | A <sup>2</sup> na/nt, C <sup>50</sup> no, S <sup>52</sup> ph, C <sup>225</sup> ro, T <sup>294</sup> nt, N <sup>300</sup> nt                                                                                    |
| Rpt5b    | AT1G09100 | 3        | A <sup>2</sup> na/nt, C <sup>224</sup> ro                                                                                                                                                                      |
| Rpt6a    | AT5G19990 | 4        | A <sup>2</sup> na/nt, C <sup>19</sup> ro/no                                                                                                                                                                    |
| Rpt6b    | AT5G20000 | 2        | A <sup>2</sup> na/nt                                                                                                                                                                                           |
| Rpn1a    | AT2G20580 | 8        | S <sup>40</sup> ph, M <sup>107</sup> mo, K <sup>113</sup> ac, K <sup>168</sup> ac, K <sup>218</sup> ub, T <sup>343</sup> ph, S <sup>359</sup> ph, C <sup>621</sup> no                                          |
| Rpn1b    | AT4G28470 | 3        | M <sup>72</sup> mo, T <sup>343</sup> ph, S <sup>359</sup> ph                                                                                                                                                   |
| Rpn2a    | AT1G08410 | 0        |                                                                                                                                                                                                                |
| Rpn2b    | AT2G32730 | 11       | A <sup>2</sup> na, K <sup>279</sup> ac, T <sup>318</sup> nt, S <sup>412</sup> nt, A <sup>433</sup> nt, K <sup>730</sup> ac, S <sup>876/878/891/896</sup> ph,                                                   |
| Rpn10    | AT4G38630 | 12       | K <sup>903</sup> nt<br>V <sup>2</sup> nt, K <sup>130</sup> ac, S <sup>136</sup> ph, S <sup>187</sup> nt, T <sup>188</sup> nt, D <sup>258</sup> nt, S <sup>263/265/363</sup> ph,<br>K <sup>379/380/386</sup> ub |
| Subunits | Gene-ID   | Quantity | Types, Locations of PTMs                                                                                                                                                                                       |
| Rpn3a    | AT1G20200 | 9        | T <sup>2</sup> nt, T <sup>12</sup> ph, S <sup>14/16/19/20</sup> ph, T <sup>22/24</sup> ph, C <sup>240</sup> no                                                                                                 |
| Rpn3b    | AT1G75990 | 8        | T <sup>12/14</sup> ph, S <sup>16/19</sup> ph, T <sup>22</sup> ph, S <sup>23</sup> ph, T <sup>24</sup> ph, C <sup>239</sup> no                                                                                  |
| Rpn5a    | AT5G09900 | 6        | G <sup>2</sup> na/nt, S <sup>4</sup> ph, K <sup>19</sup> ub, C <sup>234</sup> no, K <sup>320</sup> ac                                                                                                          |
| Rpn5b    | AT5G64760 | 2        | K <sup>19</sup> ub, C <sup>234</sup> no                                                                                                                                                                        |
| Rpn6     | AT1G29150 | 5        | V <sup>2</sup> na/nt, C <sup>51/332</sup> no, M <sup>364</sup> mo                                                                                                                                              |
| Rpn7     | AT4G24820 | 1        | M <sup>1</sup> na                                                                                                                                                                                              |
| Rpn8a    | AT5G05780 | 3        | M <sup>1</sup> na, S <sup>218</sup> ph, Y <sup>219</sup> ph                                                                                                                                                    |
| Rpn8b    | AT3G11270 | 1        | M <sup>1</sup> na                                                                                                                                                                                              |
| Rpn9a    | AT5G45620 | 1        | A <sup>2</sup> na                                                                                                                                                                                              |
| Rpn9b    | AT4G19006 | 3        | A <sup>2</sup> na/nt, A <sup>3</sup> na                                                                                                                                                                        |
| Rpn11    | AT5G23540 | 2        | K <sup>238</sup> ub, S <sup>265</sup> ph                                                                                                                                                                       |
| Rpn12a   | AT1G64520 | 2        | M <sup>1</sup> na, C <sup>190</sup> no                                                                                                                                                                         |
| Rpn12b   | AT5G42040 | 1        | C <sup>156</sup> no                                                                                                                                                                                            |
| PAA1     | AT5G35590 | 2        | K <sup>33/181</sup> ac                                                                                                                                                                                         |
| PAA2     | AT2G05840 | 1        | K <sup>181</sup> ac                                                                                                                                                                                            |
| PAB1     | AT1G16470 | 5        | G <sup>2</sup> na, K <sup>50</sup> ac, K <sup>92</sup> ub, K <sup>165/171</sup> ac                                                                                                                             |
| PAB2     | AT1G79210 | 5        | G <sup>2</sup> na, K <sup>50</sup> ac, K <sup>92</sup> ub, K <sup>165</sup> ac, K <sup>171</sup> ac                                                                                                            |
| PAC1     | AT3G22110 | 8        | K <sup>40</sup> ub, K <sup>198</sup> ac, M <sup>200</sup> mo, T <sup>218</sup> ph, S <sup>220/232</sup> ph, T <sup>234</sup> ph, k <sup>239</sup> ac                                                           |
| PAC2     | AT4G15160 | 0        |                                                                                                                                                                                                                |
| PAD1     | AT3G51260 | 3        | K <sup>29</sup> ub, L <sup>99</sup> nt, K <sup>176</sup> ac                                                                                                                                                    |
| PAD2     | AT5G66140 | 3        | K <sup>29</sup> ub, L <sup>99</sup> nt, K <sup>176</sup> ac                                                                                                                                                    |
| PAE1     | AT1G53850 | 3        | K <sup>52</sup> ac, K <sup>66</sup> ub, E <sup>95</sup> na                                                                                                                                                     |
| PAE2     | AT3G14290 | 4        | K <sup>52</sup> ac, K <sup>66/185</sup> ub, E <sup>95</sup> na                                                                                                                                                 |
| PAF1     | AT5G42790 | 7        | M <sup>1</sup> na, K <sup>51</sup> ub, S <sup>90</sup> ph/nt, S <sup>92</sup> ph, k <sup>169</sup> ub/ac                                                                                                       |
| PAF2     | AT1G47250 | 7        | M <sup>1</sup> na, K <sup>51</sup> ub, S <sup>90</sup> ph/nt, S <sup>92</sup> ph, K <sup>169</sup> ub/ac                                                                                                       |
| PAG1     | AT2G27020 | 6        | S <sup>2</sup> ph/na/nt, K <sup>173/240</sup> ac, M <sup>246</sup> mo                                                                                                                                          |
| PBA1     | AT4G31300 | 4        | T <sup>13</sup> nt, S <sup>58</sup> ph/nt, S <sup>60</sup> ph                                                                                                                                                  |
| PBB1     | AT3G27430 | 4        | T <sup>40</sup> nt, G <sup>50</sup> nt, G <sup>84</sup> nt, A <sup>85</sup> nt                                                                                                                                 |
| PBB2     | AT5G40580 | 4        | T <sup>40</sup> nt, G <sup>50</sup> nt, G <sup>84</sup> nt, A <sup>85</sup> nt                                                                                                                                 |
| PBE2     | AT3G26340 | 5        | K <sup>47/53</sup> ub, T <sup>58</sup> nt, K <sup>89/128</sup> ac                                                                                                                                              |
| PBF1     | AT3G60820 | 2        | V <sup>115</sup> nt, S <sup>163</sup> ph                                                                                                                                                                       |
| PBD2     | AT4G14800 | 0        |                                                                                                                                                                                                                |

|                  |             |   |                                       |
|------------------|-------------|---|---------------------------------------|
| <b>PBD1</b>      | AT3G22630   | 1 | M <sup>36</sup> mo                    |
| <b>PBC1</b>      | AT1G21720   | 2 | S <sup>2</sup> na, K <sup>98</sup> ac |
| <b>PBE1</b>      | AT1G13060   | 2 | K <sup>89/128</sup> ac                |
| <b>PBC2</b>      | AT1G77440   | 2 | S <sup>2</sup> na, K <sup>98</sup> ac |
| <b>PBG1</b>      | AT1G56450   | 2 | S <sup>234/235</sup> ph               |
| <b>UMP1-like</b> | AT1G67250   | 0 |                                       |
| <b>UMP1-like</b> | AT5G38650.1 | 0 |                                       |

Illustrated example: V<sup>2</sup>nt, V: modified valine; 2: second amino acid of protein sequence; nt: PTM types.

Abbreviation of different PTMs: ac/lysine acetylation, bu/lysine 2-hydroxyisobutyrylation, ca/carbonylation, ma/lysine malonylation, me/lysine methylation, mo/methionine oxidation, my/myristoylation, na/N-terminal acetylation, ng/N-glycosylation, no/S-nitrosylation, nt/N-terminus proteolysis, nu/N-terminal ubiquitination, og/O-GlcNAcylation, ph/phosphorylation, ro/reversible cysteine oxidation, sg/S-glutathionylation, sm/lysine SUMOylation, su/lysine succinylation, ub/lysine ubiquitination.
